# Supplementary material for: Application of tandem fast protein liquid chromatography to purify intact native monomeric/aggregated Tamm–Horsfall protein from human urine and systematic comparisons with diatomaceous earth adsorption and salt precipitation: yield, purity and time-consumption
Source: Royal Society of Chemistry journal article supplement (doi:10.1039/d1ay00922b), 2021-01-01
Supplement: d1ay00922b1.pdf [file d1ay00922b1.pdf]

## SUPPLEMENTARY INFORMATION

### Application of tandem fast protein liquid chromatography to purify intact native monomeric/aggregated Tamm-Horsfall protein from the human urine and systematic comparisons with diatomaceous earth adsorption and salt precipitation: Yield, purity and time-consumption

Chadanat Noonin, Chompunoot Kapincharanon, Kanyarat Sueksakit, Rattiyaporn Kanlaya, and Visith Thongboonkerd\*  
(\* Correspondence to: [thongboonkerd@dr.com](mailto:thongboonkerd@dr.com) (or) [vihongbo@yahoo.com](mailto:vihongbo@yahoo.com))

Medical Proteomics Unit, Office for Research and Development, Faculty of Medicine Siriraj Hospital,  
Mahidol University, Bangkok 10700, Thailand

**Supplementary Table S1:** Raw intensity data used for calculating %Yield.

| Sample number | THP band intensity in each sample |                    |               |             | <i>Formula 1: %Yield = (THP intensity in each purified sample / THP intensity in whole urine) ×100</i> |               |              |
|---------------|-----------------------------------|--------------------|---------------|-------------|--------------------------------------------------------------------------------------------------------|---------------|--------------|
|               | Whole urine                       | Salt precipitation | DE adsorption | Tandem FPLC | Salt precipitation                                                                                     | DE adsorption | Tandem FPLC  |
| N1            | 16777844                          | 7444236            | 10247757      | 1353156     | 44.37                                                                                                  | 61.08         | 8.07         |
| N2            | 24616436                          | 12261993           | 21326062      | 4226455     | 49.81                                                                                                  | 86.63         | 17.17        |
| N3            | 16218859                          | 6584919            | 10586256      | 1076211     | 39.25                                                                                                  | 63.10         | 6.41         |
| <b>Mean</b>   |                                   |                    |               |             | <b>44.48</b>                                                                                           | <b>70.27</b>  | <b>10.55</b> |
| <b>SEM</b>    |                                   |                    |               |             | <b>3.05</b>                                                                                            | <b>8.20</b>   | <b>3.35</b>  |

**Supplementary Table S2:** Raw intensity data used for calculating %Purity.

| Sample number | Band intensity in each sample |           |               |           |             |           | <i>Formula 2: %Purity = (THP intensity in each purified sample / Intensity of all protein bands in the same sample) ×100</i> |               |              |
|---------------|-------------------------------|-----------|---------------|-----------|-------------|-----------|------------------------------------------------------------------------------------------------------------------------------|---------------|--------------|
|               | Salt precipitation            |           | DE adsorption |           | Tandem FPLC |           | Salt precipitation                                                                                                           | DE adsorption | Tandem FPLC  |
|               | THP band                      | All bands | THP band      | All bands | THP band    | All bands |                                                                                                                              |               |              |
| N1            | 12218796                      | 21174864  | 17750038      | 20705962  | 21607998    | 30057848  | 57.70                                                                                                                        | 85.72         | 71.89        |
| N2            | 13598292                      | 21671242  | 17639449      | 20442056  | 20838135    | 27960724  | 62.75                                                                                                                        | 86.29         | 74.53        |
| N3            | 10952045                      | 16512794  | 13160636      | 14677278  | 19280825    | 26924402  | 66.32                                                                                                                        | 89.67         | 71.61        |
| <b>Mean</b>   |                               |           |               |           |             |           | <b>62.26</b>                                                                                                                 | <b>87.23</b>  | <b>72.68</b> |
| <b>SEM</b>    |                               |           |               |           |             |           | <b>2.50</b>                                                                                                                  | <b>1.23</b>   | <b>0.93</b>  |
